# Supplementary material for: Transcriptional profiling of macrophages reveals distinct parasite stage-driven signatures during early infection by Leishmania donovani
Source: PubMed Central journal article supplement (PMC9013368; doi:10.1038/s41598-022-10317-6), 2022-04-16
Supplement: 41598_2022_10317_MOESM6_ESM.pdf [file 41598_2022_10317_MOESM6_ESM.pdf]

**Table S4. Primer sequences used for RT-qPCR analyses**

| <b>Gene</b>  | <b>Primer sequence (5' - 3')</b>          |
|--------------|-------------------------------------------|
| <i>Actb</i>  | Forward 5'- CACCCACACTGTGCCCATCTACGA -3'  |
|              | Reverse 5'- CAGCGGAACCGCTCATTGCCAATGG -3' |
| <i>Ccl5</i>  | Forward 5'- TCACCATATGGCTCGGACACC -3'     |
|              | Reverse 5'- CACACTTGGCGGTTTCCTTCG -3'     |
| <i>Cd274</i> | Forward 5'- CTGAGTTACCCCAGTACCAAGG -3'    |
|              | Reverse 5'- AAGTGAGGCGTCTGTGTTTG -3'      |
| <i>Hmox1</i> | Forward 5'- AACCCCAGATCAGCACTAGC -3'      |
|              | Reverse 5'- GTTGCCAACAGGAAGCTGAG -3'      |
